# Supplementary material for: Examination of wettability and surface energy in fluorodecyl POSS/polymer blends
Source: Royal Society of Chemistry journal article supplement (doi:10.1039/c1sm05994g), 2011-01-01
Supplement: c1sm05994g.pdf [file c1sm05994g.pdf]

**Table S1** Values of total ( $\gamma_{lv}$ ), dispersion ( $\gamma_{lv}^d$ ), polar ( $\gamma_{lv}^p$ ), hydrogen bond donating ( $\gamma_{lv}^+$ ), and hydrogen bond accepting ( $\gamma_{lv}^-$ ) surface energies in mN/m

(Data reproduced from Reference 1)

| <b>Liquid</b>         | $\gamma_{lv}$ | $\gamma_{lv}^d$ | $\gamma_{lv}^p$ | $\gamma_{lv}^+$ | $\gamma_{lv}^-$ |
|-----------------------|---------------|-----------------|-----------------|-----------------|-----------------|
| Water                 | 72.1          | 21.1            | 51.0            | 25.5            | 25.5            |
| Ethylene<br>Glycol    | 47.7          | 28.7            | 19.0            | 1.9             | 47.0            |
| Dimethyl<br>Sulfoxide | 44.0          | 36.0            | 8.0             | 0.5             | 32.0            |
| Diiodomethane         | 50.8          | 50.8            | 0.0             | 0.0             | 0.0             |
| Rapeseed Oil          | 35.5          | 35.5            | 0.0             | 0.0             | 0.0             |
| Hexadecane            | 27.8          | 27.8            | 0.0             | 0.0             | 0.0             |

**Table S2** Measured advancing contact angles  $\theta_{adv}$  of six probe liquids on the 36 test surfaces<sup>a</sup>

| Sample                          | Water       | Ethylene Glycol | Dimethyl Sulfoxide | Diiodomethane | Rapeseed Oil | Hexadecane |
|---------------------------------|-------------|-----------------|--------------------|---------------|--------------|------------|
| PC                              | 87.2 ± 1.3  | 75.7 ± 3.8      | 60.5 ± 6.0         | 40.8 ± 4.1    | 44.2 ± 6.2   | 24.0 ± 6.7 |
| Fluoroalkylsilane <sup>b</sup>  | 123.0 ± 1.9 | 101.7 ± 1.5     | 109.8 ± 0.6        | 106.6 ± 2.4   | 84.2 ± 2.0   | 78.4 ± 3.1 |
| Teflon AF-2400                  | 125.4 ± 1.1 | 103.5 ± 1.1     | 101.3 ± 1.1        | 104.4 ± 1.7   | 82.3 ± 2.5   | 69.7 ± 2.1 |
| PMMA                            | 77.3 ± 1.3  | 65.4 ± 3.0      | 47.5 ± 3.2         | 45.8 ± 1.9    | 29.7 ± 6.5   | 16.1 ± 3.0 |
| 99/1 PMMA/<br>Fluorodecyl POSS  | 100.4 ± 3.1 | 68.3 ± 2.1      | 55.3 ± 3.9         | 64.9 ± 5.4    | 38.9 ± 5.8   | 41.5 ± 2.5 |
| 97/3 PMMA/<br>Fluorodecyl POSS  | 108.6 ± 0.5 | 83.3 ± 5.6      | 73.2 ± 1.7         | 93.4 ± 2.1    | 71.1 ± 4.1   | 61.3 ± 4.5 |
| 95/5 PMMA/<br>Fluorodecyl POSS  | 116.6 ± 1.2 | 93.6 ± 4.4      | 89.3 ± 2.3         | 94.6 ± 3.8    | 69.9 ± 6.1   | 66.4 ± 7.4 |
| 90/10 PMMA/<br>Fluorodecyl POSS | 123.5 ± 1.0 | 105.5 ± 0.4     | 102.0 ± 1.2        | 102.3 ± 1.4   | 83.6 ± 3.2   | 79.8 ± 1.9 |
| 80/20 PMMA/<br>Fluorodecyl POSS | 123.9 ± 0.3 | 104.5 ± 0.5     | 102.5 ± 0.8        | 102.5 ± 1.4   | 86.6 ± 1.2   | 79.9 ± 1.5 |
| 70/30 PMMA/<br>Fluorodecyl POSS | 124.0 ± 0.4 | 105.0 ± 1.1     | 104.4 ± 0.4        | 103.6 ± 0.8   | 87.3 ± 1.4   | 79.0 ± 0.6 |
| 50/50 PMMA/<br>Fluorodecyl POSS | 124.2 ± 1.1 | 104.7 ± 1.4     | 105.4 ± 0.9        | 104.8 ± 1.5   | 87.5 ± 2.2   | 79.4 ± 1.6 |
| PEMA                            | 85.5 ± 1.4  | 65.3 ± 2.6      | 54.1 ± 2.4         | 57.4 ± 2.8    | 38.3 ± 1.7   | 16.6 ± 2.8 |
| 99/1 PEMA/<br>Fluorodecyl POSS  | 99.7 ± 1.5  | 71.8 ± 6.0      | 69.8 ± 1.8         | 70.6 ± 2.0    | 53.0 ± 2.9   | 47.5 ± 1.2 |
| 97/3 PEMA/<br>Fluorodecyl POSS  | 117.3 ± 0.8 | 92.9 ± 6.1      | 94.0 ± 1.5         | 85.7 ± 6.3    | 81.4 ± 0.7   | 75.4 ± 0.9 |
| 95/5 PEMA/<br>Fluorodecyl POSS  | 122.0 ± 0.6 | 102.8 ± 3.8     | 101.5 ± 1.7        | 98.5 ± 4.9    | 81.9 ± 2.8   | 80.6 ± 1.1 |
| 90/10 PEMA/<br>Fluorodecyl POSS | 123.1 ± 0.4 | 107.3 ± 1.3     | 102.1 ± 1.0        | 102.4 ± 0.7   | 85.5 ± 1.7   | 79.5 ± 0.9 |
| 80/20 PEMA/<br>Fluorodecyl POSS | 124.3 ± 0.5 | 104.6 ± 1.6     | 103.0 ± 1.0        | 103.2 ± 0.8   | 85.7 ± 3.4   | 79.6 ± 1.4 |
| 70/30 PEMA/<br>Fluorodecyl POSS | 124.7 ± 0.4 | 104.5 ± 1.8     | 102.5 ± 1.2        | 103.4 ± 0.8   | 86.5 ± 1.9   | 77.1 ± 1.8 |
| 50/50 PEMA/<br>Fluorodecyl POSS | 126.4 ± 0.5 | 106.1 ± 1.2     | 106.0 ± 0.6        | 104.2 ± 2.1   | 87.1 ± 1.8   | 79.3 ± 1.2 |
| PBMA                            | 93.7 ± 0.9  | 71.5 ± 2.1      | 69.5 ± 1.6         | 70.8 ± 5.5    | 41.8 ± 1.7   | 22.1 ± 3.0 |
| 99/1 PBMA/<br>Fluorodecyl POSS  | 103.0 ± 2.1 | 75.4 ± 2.1      | 71.6 ± 1.6         | 97.3 ± 3.6    | 49.1 ± 4.9   | 41.5 ± 1.0 |
| 97/3 PBMA/<br>Fluorodecyl POSS  | 117.2 ± 1.0 | 95.9 ± 1.5      | 94.7 ± 1.3         | c             | 63.2 ± 3.8   | 60.9 ± 3.9 |
| 95/5 PBMA/<br>Fluorodecyl POSS  | 123.5 ± 0.4 | 102.4 ± 2.2     | 102.6 ± 0.7        | c             | 81.8 ± 2.1   | 76.5 ± 2.8 |

|                                      |             |             |             |             |            |            |
|--------------------------------------|-------------|-------------|-------------|-------------|------------|------------|
| 90/10 PBMA/<br>Fluorodecyl POSS      | 121.9 ± 1.1 | 105.4 ± 1.0 | 102.5 ± 0.9 | c           | 83.0 ± 3.7 | 79.4 ± 1.8 |
| 80/20 PBMA/<br>Fluorodecyl POSS      | 122.0 ± 1.4 | 105.5 ± 1.3 | 101.3 ± 1.2 | c           | 86.8 ± 1.5 | 79.4 ± 1.8 |
| 70/30 PBMA/<br>Fluorodecyl POSS      | 124.8 ± 1.2 | 105.7 ± 1.0 | 102.4 ± 1.3 | c           | 86.8 ± 0.8 | 78.4 ± 1.5 |
| 50/50 PBMA/<br>Fluorodecyl POSS      | 127.7 ± 0.7 | 107.4 ± 0.6 | 103.2 ± 1.3 | 104.4 ± 1.7 | 87.9 ± 1.9 | 79.0 ± 1.7 |
| Tecnoflon                            | 118.3 ± 1.1 | 97.0 ± 0.8  | 92.1 ± 2.2  | 97.8 ± 1.0  | 78.5 ± 1.5 | 66.9 ± 2.3 |
| 99/1 Tecnoflon/<br>Fluorodecyl POSS  | 126.7 ± 1.3 | 115.0 ± 3.2 | 114.0 ± 2.9 | 112.4 ± 4.9 | 95.8 ± 4.0 | 88.5 ± 2.1 |
| 97/3 Tecnoflon/<br>Fluorodecyl POSS  | 125.7 ± 0.6 | 113.7 ± 4.0 | 108.3 ± 2.2 | 107.3 ± 0.8 | 97.9 ± 2.5 | 81.6 ± 0.4 |
| 95/5 Tecnoflon/<br>Fluorodecyl POSS  | 125.0 ± 1.1 | 107.2 ± 1.5 | 106.5 ± 2.6 | 105.3 ± 1.6 | 89.2 ± 2.6 | 82.1 ± 0.8 |
| 90/10 Tecnoflon/<br>Fluorodecyl POSS | 124.6 ± 0.4 | 107.6 ± 0.7 | 108.2 ± 1.0 | 106.7 ± 1.5 | 89.5 ± 2.1 | 81.3 ± 1.1 |
| 80/20 Tecnoflon/<br>Fluorodecyl POSS | 124.3 ± 0.4 | 109.1 ± 3.0 | 103.9 ± 2.6 | 106.5 ± 2.3 | 91.2 ± 3.4 | 80.7 ± 0.9 |
| 70/30 Tecnoflon/<br>Fluorodecyl POSS | 123.7 ± 0.4 | 104.8 ± 0.6 | 101.8 ± 0.8 | 105.0 ± 1.0 | 87.5 ± 1.6 | 80.4 ± 1.3 |
| 50/50 Tecnoflon/<br>Fluorodecyl POSS | 126.3 ± 0.6 | 107.3 ± 0.9 | 102.9 ± 1.0 | 105.2 ± 0.8 | 89.5 ± 1.7 | 80.7 ± 0.7 |
| Fluorodecyl POSS                     | 125.4 ± 0.6 | 107.5 ± 1.0 | 104.5 ± 1.5 | 106.2 ± 1.9 | 89.4 ± 1.6 | 81.2 ± 0.8 |

<sup>a</sup> Reported uncertainties are standard deviations from eight measured contact angle values.

<sup>b</sup> 1H,1H,2H,2H-perfluorodecyltrichlorosilane.

<sup>c</sup> Measurement of angles is difficult because drops do not advance smoothly. See Fig. S3 for details.

**Table S3** Measured receding contact angles  $\theta_{rec}$  of various probe liquids on the 36 test surfaces<sup>a</sup>

| <b>Sample</b>                   | <b>Water</b> | <b>Ethylene Glycol</b> | <b>Dimethyl Sulfoxide</b> | <b>Diiodomethane</b> | <b>Rapeseed Oil</b> | <b>Hexadecane</b> |
|---------------------------------|--------------|------------------------|---------------------------|----------------------|---------------------|-------------------|
| PC                              | 72.3 ± 1.2   | 46.9 ± 4.1             | 30.1 ± 3.5                | 15.3 ± 1.9           | 21.3 ± 2.0          | < 10              |
| Fluoroalkylsilane <sup>b</sup>  | 93.0 ± 3.1   | 74.5 ± 3.6             | 66.2 ± 1.4                | 73.2 ± 2.7           | 48.9 ± 3.5          | 53.1 ± 2.1        |
| Teflon AF-2400                  | 113.4 ± 0.8  | 93.9 ± 2.2             | 89.3 ± 1.0                | 88.4 ± 2.3           | 58.6 ± 3.7          | 58.1 ± 2.8        |
| PMMA                            | 61.2 ± 1.4   | 43.0 ± 3.0             | 31.2 ± 3.0                | 22.2 ± 1.3           | 15.3 ± 2.3          | < 10              |
| 99/1 PMMA/<br>Fluorodecyl POSS  | 63.9 ± 1.0   | 48.7 ± 2.0             | 31.3 ± 2.1                | 23.5 ± 3.3           | 15.8 ± 1.3          | 16.1 ± 2.3        |
| 97/3 PMMA/<br>Fluorodecyl POSS  | 74.7 ± 1.2   | 52.9 ± 3.8             | 33.0 ± 5.2                | 26.3 ± 2.8           | 30.1 ± 5.0          | 22.5 ± 2.8        |
| 95/5 PMMA/<br>Fluorodecyl POSS  | 91.2 ± 2.0   | 67.4 ± 3.5             | 36.6 ± 3.4                | 35.0 ± 3.5           | 34.4 ± 3.6          | 31.6 ± 5.9        |
| 90/10 PMMA/<br>Fluorodecyl POSS | 115.2 ± 0.8  | 92.1 ± 1.8             | 54.4 ± 1.8                | 68.8 ± 8.6           | 49.8 ± 6.0          | 46.2 ± 5.8        |
| 80/20 PMMA/<br>Fluorodecyl POSS | 118.1 ± 0.8  | 99.2 ± 0.8             | 84.6 ± 0.8                | 88.2 ± 2.7           | 79.0 ± 1.8          | 74.6 ± 2.0        |
| 70/30 PMMA/<br>Fluorodecyl POSS | 119.8 ± 0.8  | 98.4 ± 1.8             | 89.0 ± 1.1                | 87.4 ± 3.0           | 75.8 ± 3.5          | 73.4 ± 2.9        |
| 50/50 PMMA/<br>Fluorodecyl POSS | 118.3 ± 1.9  | 97.8 ± 3.1             | 90.7 ± 1.0                | 90.8 ± 4.0           | 78.4 ± 1.4          | 73.1 ± 0.9        |
| PEMA                            | 70.5 ± 1.9   | 52.4 ± 2.7             | 38.8 ± 1.5                | 19.5 ± 4.1           | 17.5 ± 1.2          | < 10              |
| 99/1 PEMA/<br>Fluorodecyl POSS  | 75.9 ± 1.0   | 53.4 ± 2.5             | 39.4 ± 2.5                | 23.2 ± 2.5           | 28.0 ± 2.8          | 19.9 ± 2.2        |
| 97/3 PEMA/<br>Fluorodecyl POSS  | 98.0 ± 2.0   | 65.1 ± 3.4             | 47.8 ± 4.0                | 34.4 ± 3.7           | 46.4 ± 7.0          | 21.4 ± 2.1        |
| 95/5 PEMA/<br>Fluorodecyl POSS  | 112.7 ± 2.4  | 75.1 ± 8.8             | 65.8 ± 4.6                | 44.3 ± 7.6           | 55.2 ± 12.3         | 51.5 ± 6.2        |
| 90/10 PEMA/<br>Fluorodecyl POSS | 119.3 ± 1.7  | 90.3 ± 3.3             | 84.9 ± 1.8                | 77.8 ± 4.1           | 70.2 ± 4.7          | 73.9 ± 1.6        |
| 80/20 PEMA/<br>Fluorodecyl POSS | 117.9 ± 2.1  | 98.3 ± 2.3             | 88.3 ± 1.0                | 91.8 ± 2.5           | 77.7 ± 1.3          | 73.3 ± 1.6        |
| 70/30 PEMA/<br>Fluorodecyl POSS | 117.7 ± 1.3  | 98.0 ± 2.5             | 87.1 ± 2.1                | 83.3 ± 1.8           | 78.8 ± 0.6          | 71.3 ± 3.7        |
| 50/50 PEMA/<br>Fluorodecyl POSS | 117.8 ± 0.5  | 96.1 ± 2.0             | 91.8 ± 1.0                | 86.4 ± 1.4           | 75.7 ± 1.9          | 70.7 ± 2.1        |
| PBMA                            | 77.7 ± 0.8   | 59.7 ± 1.0             | 58.2 ± 1.5                | 25.7 ± 6.4           | 18.0 ± 1.8          | 13.4 ± 2.3        |
| 99/1 PBMA/<br>Fluorodecyl POSS  | 79.9 ± 2.0   | 66.8 ± 2.3             | 53.1 ± 2.4                | 23.5 ± 4.9           | 25.7 ± 5.1          | 23.2 ± 2.7        |
| 97/3 PBMA/<br>Fluorodecyl POSS  | 99.5 ± 1.6   | 82.0 ± 2.7             | 69.5 ± 1.0                | 34.1 ± 4.8           | 26.5 ± 6.7          | 36.1 ± 2.7        |
| 95/5 PBMA/<br>Fluorodecyl POSS  | 116.4 ± 1.4  | 90.7 ± 5.0             | 77.8 ± 3.2                | 35.1 ± 11.2          | 43.8 ± 5.8          | 40.9 ± 5.7        |

|                                      |             |            |            |            |            |            |
|--------------------------------------|-------------|------------|------------|------------|------------|------------|
| 90/10 PBMA/<br>Fluorodecyl POSS      | 119.1 ± 1.0 | 90.6 ± 2.5 | 84.2 ± 1.2 | 38.3 ± 6.8 | 51.5 ± 6.8 | 53.9 ± 3.3 |
| 80/20 PBMA/<br>Fluorodecyl POSS      | 119.1 ± 1.0 | 97.3 ± 1.0 | 85.3 ± 2.0 | 40.1 ± 7.3 | 73.3 ± 0.8 | 70.5 ± 1.9 |
| 70/30 PBMA/<br>Fluorodecyl POSS      | 117.0 ± 0.9 | 98.3 ± 0.8 | 87.3 ± 2.2 | 49.9 ± 5.4 | 72.3 ± 4.9 | 73.2 ± 1.0 |
| 50/50 PBMA/<br>Fluorodecyl POSS      | 117.0 ± 0.6 | 96.0 ± 1.5 | 86.6 ± 2.0 | 75.2 ± 3.6 | 75.6 ± 1.8 | 70.6 ± 2.6 |
| Tecnoflon                            | 77.1 ± 2.4  | 58.2 ± 1.3 | 41.9 ± 2.0 | 54.3 ± 1.2 | 41.4 ± 2.4 | 36.9 ± 4.8 |
| 99/1 Tecnoflon/<br>Fluorodecyl POSS  | 85.1 ± 2.6  | 66.4 ± 1.7 | 49.0 ± 2.3 | 66.2 ± 2.5 | 64.1 ± 1.7 | 66.8 ± 3.8 |
| 97/3 Tecnoflon/<br>Fluorodecyl POSS  | 90.8 ± 1.8  | 67.4 ± 2.9 | 62.3 ± 5.6 | 76.2 ± 1.3 | 69.6 ± 2.2 | 70.2 ± 2.2 |
| 95/5 Tecnoflon/<br>Fluorodecyl POSS  | 94.9 ± 3.4  | 75.6 ± 2.1 | 71.6 ± 4.0 | 79.1 ± 2.2 | 74.4 ± 1.8 | 73.5 ± 2.4 |
| 90/10 Tecnoflon/<br>Fluorodecyl POSS | 97.1 ± 2.3  | 83.5 ± 2.4 | 69.4 ± 4.2 | 80.3 ± 4.0 | 75.2 ± 3.9 | 74.4 ± 2.1 |
| 80/20 Tecnoflon/<br>Fluorodecyl POSS | 106.3 ± 2.9 | 85.5 ± 2.1 | 77.3 ± 4.2 | 87.7 ± 1.5 | 77.4 ± 3.6 | 76.5 ± 0.7 |
| 70/30 Tecnoflon/<br>Fluorodecyl POSS | 111.5 ± 1.6 | 89.6 ± 2.9 | 79.5 ± 2.4 | 88.1 ± 2.1 | 77.3 ± 3.5 | 74.6 ± 2.9 |
| 50/50 Tecnoflon/<br>Fluorodecyl POSS | 114.1 ± 0.9 | 86.5 ± 1.6 | 80.0 ± 1.3 | 88.7 ± 2.0 | 73.4 ± 3.4 | 71.5 ± 1.6 |
| Fluorodecyl POSS                     | 111.9 ± 0.8 | 87.9 ± 2.1 | 82.4 ± 1.2 | 87.0 ± 2.6 | 71.0 ± 4.1 | 72.5 ± 2.1 |

<sup>a</sup> Reported uncertainties are standard deviations from eight measured contact angle values.

<sup>b</sup> 1H,1H,2H,2H-perfluorodecyltrichlorosilane.

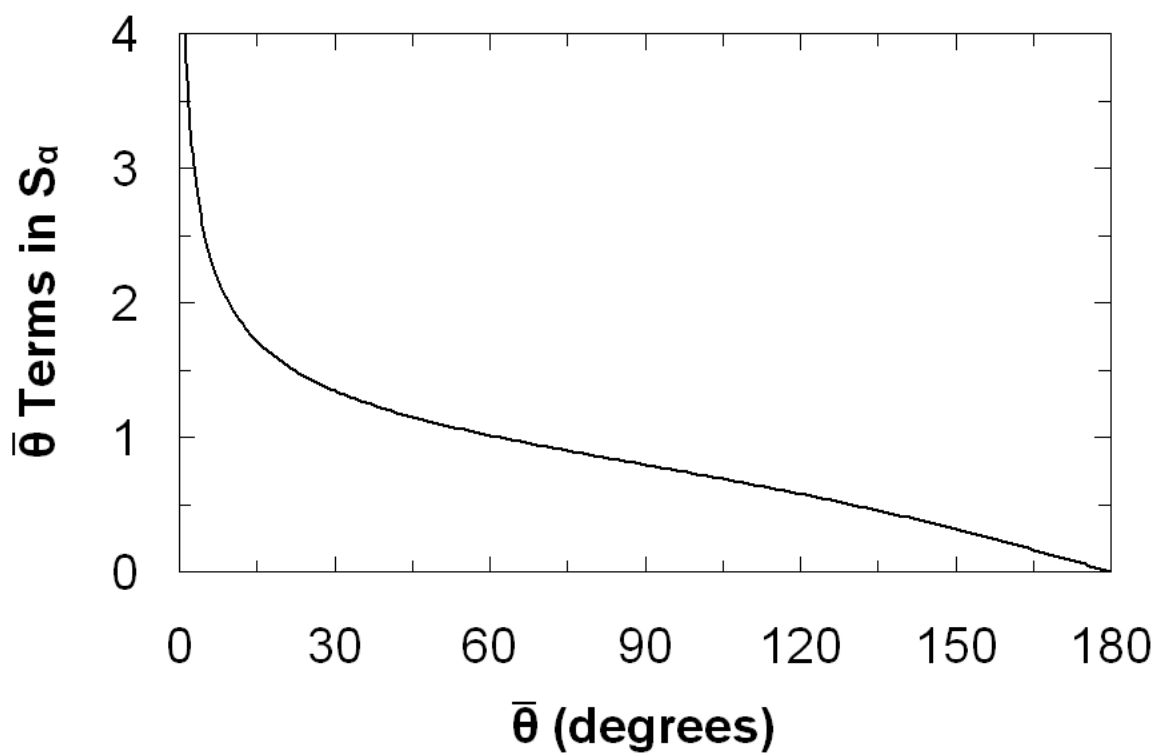

**Fig. S1.** Plot of the terms in  $S_\alpha$  that contain  $\bar{\theta}$  and influence the drop width  $w$  (i.e.,

$$\frac{\sin \bar{\theta}}{(2 - 3 \cos \bar{\theta} + \cos^3 \bar{\theta})^{1/3}})$$
 as a function of  $\bar{\theta}$ .

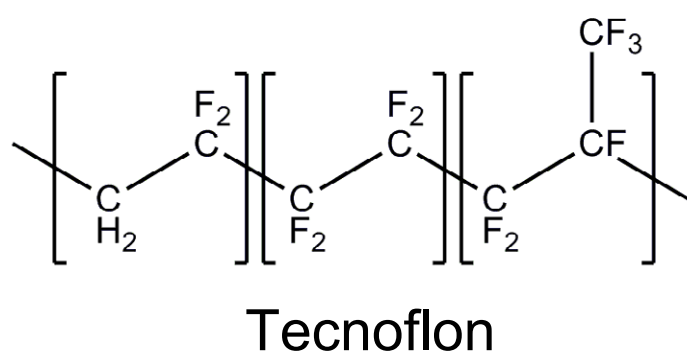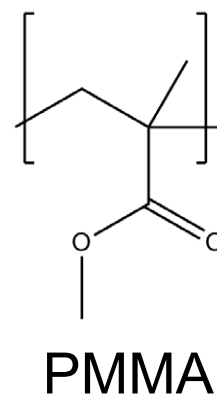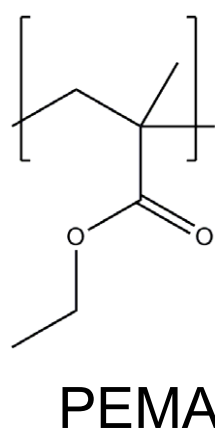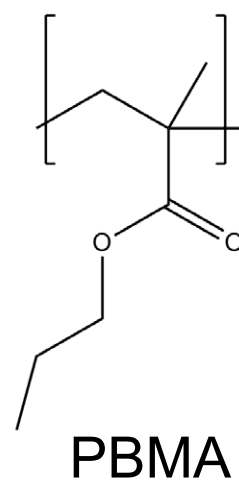

**Fig. S2.** Chemical structures of the polymers that are blended with fluorodecyl POSS in this work..

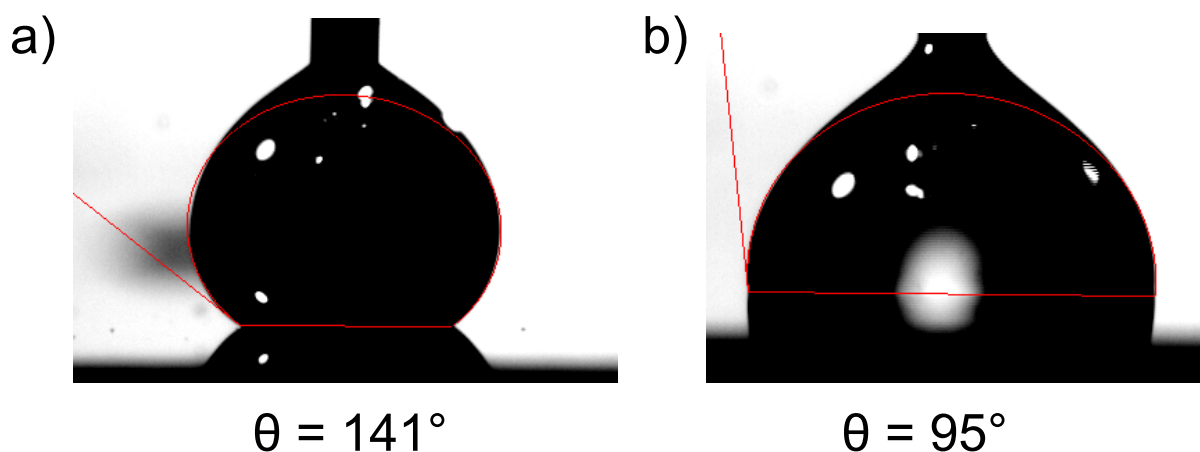

**Fig. S3.** Photographs of diiodomethane droplets on 80/20 PBMA/ fluorodecyl POSS. As liquid is syringed into the droplet, the contact angle approaches  $141^\circ$ , as illustrated in (a). When sufficient liquid is added, the drop quickly advances forward to a contact angle of  $95^\circ$ , as shown in (b). This slip/ stick motion is repeated as additional diiodomethane is syringed into the droplet. Advancing contact angle data from droplets advancing by this slip/ stick mechanism are not used to evaluate solid surface energy.



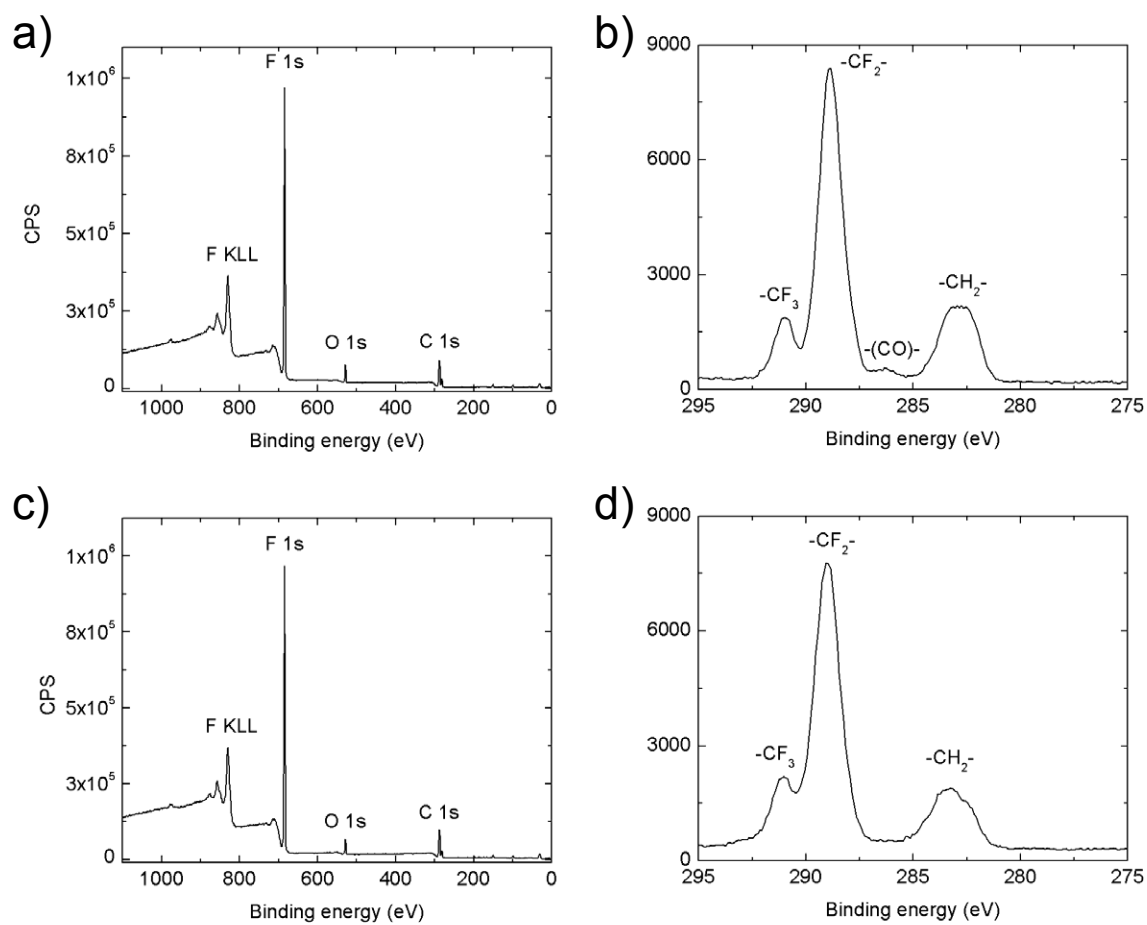

**Fig. S4.** XPS data acquired for spin-cast films of (a,b) 80/20 PEMA/ fluorodecyl POSS and (c,d) 80/20 Tecnoflon/ fluorodecyl POSS. Survey spectra for the (a) 80/20 PEMA/ fluorodecyl POSS and (c) 80/20 Tecnoflon/ fluorodecyl POSS in which the elemental peaks corresponding to F, O, and C are labeled. High resolution carbon 1s spectra for the (b) 80/20 PEMA/ fluorodecyl POSS and (d) 80/20 Tecnoflon/ fluorodecyl POSS wherein peaks corresponding to various carbon moieties located near the surface are labeled.

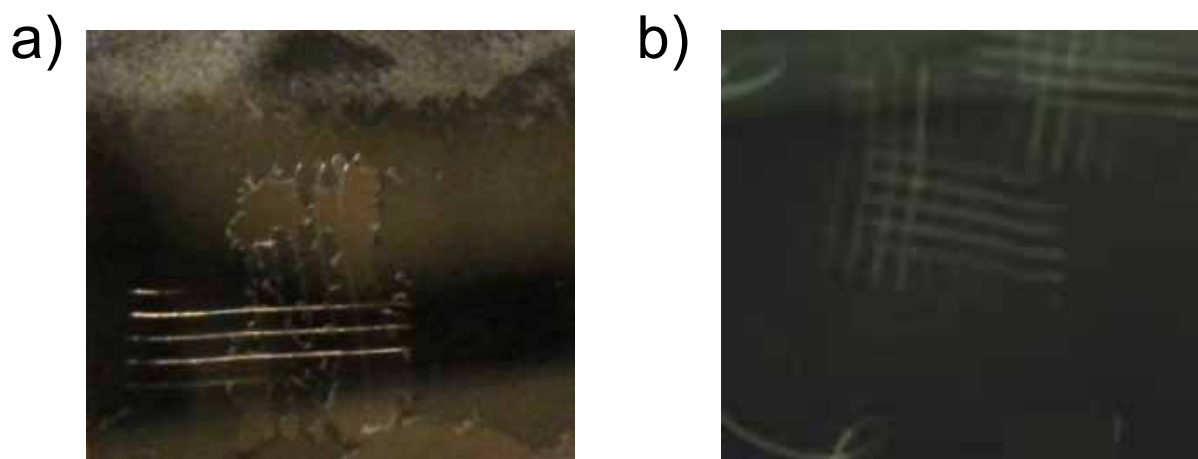

**Fig. S5.** Photographs of silicon wafers that were coated and subjected to a cross-cut adhesion test: (a) 80/20 Tecnoflon/ fluorodecyl POSS and (b) 80/20 PEMA/ fluorodecyl POSS. The ASTM categorizations of strengths of adhesion of these coatings are (a) 1B (low adhesion) and (b) 5B (highest adhesion).

### References

- (1) Chaudhury, M. K. Interfacial interaction between low-energy surfaces. *Materials Science & Engineering R-Reports* **1996**, *16*, 97-159.
